# Supplementary material
Source: publisher figshare collection journal article supplement (https://acs.figshare.com/ndownloader/files/3830467)
Supplement: Supplementary file 1 [file 3830467]

 
data_0611_sqr 
 
_audit_creation_method            SHELXL-97 
_chemical_name_systematic 
; 
 ? 
; 
_chemical_name_common             ? 
_chemical_melting_point           ? 
_chemical_formula_moiety          ? 
_chemical_formula_sum 
 'C40 H42 Cl4 Fe2 N6' 
_chemical_formula_weight          860.30 
 
loop_ 
 _atom_type_symbol 
 _atom_type_description 
 _atom_type_scat_dispersion_real 
 _atom_type_scat_dispersion_imag 
 _atom_type_scat_source 
 'C'  'C'   0.0033   0.0016 
 'International Tables Vol C Tables 4.2.6.8 and 6.1.1.4' 
 'H'  'H'   0.0000   0.0000 
 'International Tables Vol C Tables 4.2.6.8 and 6.1.1.4' 
 'N'  'N'   0.0061   0.0033 
 'International Tables Vol C Tables 4.2.6.8 and 6.1.1.4' 
 'Cl'  'Cl'   0.1484   0.1585 
 'International Tables Vol C Tables 4.2.6.8 and 6.1.1.4' 
 'Fe'  'Fe'   0.3463   0.8444 
 'International Tables Vol C Tables 4.2.6.8 and 6.1.1.4' 
 
_symmetry_cell_setting            'Monoclinic' 
_symmetry_space_group_name_H-M    'C2/c' 
 
loop_ 
 _symmetry_equiv_pos_as_xyz 
 'x, y, z' 
 '-x, y, -z+1/2' 
 'x+1/2, y+1/2, z' 
 '-x+1/2, y+1/2, -z+1/2' 
 '-x, -y, -z' 
 'x, -y, z-1/2' 
 '-x+1/2, -y+1/2, -z' 
 'x+1/2, -y+1/2, z-1/2' 
 
_cell_length_a                    24.995(3) 
_cell_length_b                    13.8687(17) 
_cell_length_c                    16.1645(19) 
_cell_angle_alpha                 90.00 
_cell_angle_beta                  129.524(3) 
_cell_angle_gamma                 90.00 
_cell_volume                      4322.3(9) 
_cell_formula_units_Z             4 
_cell_measurement_temperature     100(2) 
_cell_measurement_reflns_used     1645 
_cell_measurement_theta_min       2.85 
_cell_measurement_theta_max       17.24 
 
_exptl_crystal_description        'BLOCK' 
_exptl_crystal_colour             'YELLOW' 
_exptl_crystal_size_max           0.20 
_exptl_crystal_size_mid           0.10 
_exptl_crystal_size_min           0.05 
_exptl_crystal_density_meas       ? 
_exptl_crystal_density_diffrn     1.322 
_exptl_crystal_density_method     'not measured' 
_exptl_crystal_F_000              1776 
_exptl_absorpt_coefficient_mu     0.953 
_exptl_absorpt_correction_type    'multi-scan' 
_exptl_absorpt_correction_T_min   0.8323 
_exptl_absorpt_correction_T_max   0.9539 
_exptl_absorpt_process_details    'sadabs' 
 
_exptl_special_details 
; 
 ? 
; 
 
_diffrn_ambient_temperature       100(2) 
_diffrn_radiation_wavelength      0.71073 
_diffrn_radiation_type            MoK\a 
_diffrn_radiation_source          'fine-focus sealed tube' 
_diffrn_radiation_monochromator   graphite 
_diffrn_measurement_device_type   'Bruker APEX-II CCD' 
_diffrn_measurement_method        'phi and omega scans' 
_diffrn_detector_area_resol_mean  ? 
_diffrn_reflns_number             16518 
_diffrn_reflns_av_R_equivalents   0.0857 
_diffrn_reflns_av_sigmaI/netI     0.0491 
_diffrn_reflns_limit_h_min        -24 
_diffrn_reflns_limit_h_max        24 
_diffrn_reflns_limit_k_min        -13 
_diffrn_reflns_limit_k_max        13 
_diffrn_reflns_limit_l_min        -15 
_diffrn_reflns_limit_l_max        16 
_diffrn_reflns_theta_min          1.81 
_diffrn_reflns_theta_max          25.10 
_reflns_number_total              2202 
_reflns_number_gt                 1719 
_reflns_threshold_expression      >2sigma(I) 
 
_computing_data_collection        'Bruker APEX2' 
_computing_cell_refinement        'Bruker SAINT' 
_computing_data_reduction         'Bruker SAINT' 
_computing_structure_solution     'SHELXS-97 (Sheldrick, 2008)' 
_computing_structure_refinement   'SHELXL-97 (Sheldrick, 2008)' 
_computing_molecular_graphics     'Bruker SHELXTL' 
_computing_publication_material   'ORTEP 3V2' 
 
_refine_special_details 
; 
 Refinement of F^2^ against ALL reflections.  The weighted R-factor wR and 
 goodness of fit S are based on F^2^, conventional R-factors R are based 
 on F, with F set to zero for negative F^2^. The threshold expression of 
 F^2^ > 2sigma(F^2^) is used only for calculating R-factors(gt) etc. and is 
 not relevant to the choice of reflections for refinement.  R-factors based 
 on F^2^ are statistically about twice as large as those based on F, and R- 
 factors based on ALL data will be even larger. 
; 

loop_
  _platon_squeeze_void_nr
  _platon_squeeze_void_average_x
  _platon_squeeze_void_average_y
  _platon_squeeze_void_average_z
  _platon_squeeze_void_volume
  _platon_squeeze_void_count_electrons
  _platon_squeeze_void_content
   1  0.500  0.046  0.250       127        58 ' '
   2  0.500 -0.049  0.750       121        57 ' '
   3  1.000  0.453  0.750       126        58 ' '
   4  1.000  0.548  0.250       121        57 ' '
_platon_squeeze_details  
;The unit cell contains four disordered dichloromethane and four methanol molecules which have been 
treated as a diffuse contribution to the overall scattering without 
specific atom positions by SQUEEZE/PLATON.
;


_refine_ls_structure_factor_coef  Fsqd  
_refine_ls_matrix_type            full 
_refine_ls_weighting_scheme       calc  
_refine_ls_weighting_details 
 'calc w=1/[\s^2^(Fo^2^)+(0.1000P)^2^+0.0000P] where P=(Fo^2^+2Fc^2^)/3' 
_atom_sites_solution_primary      direct 
_atom_sites_solution_secondary    difmap 
_atom_sites_solution_hydrogens    geom 
_refine_ls_hydrogen_treatment     'constr' 
_refine_ls_extinction_method      none 
_refine_ls_extinction_coef        ? 
_refine_ls_number_reflns          2202 
_refine_ls_number_parameters      237 
_refine_ls_number_restraints      0 
_refine_ls_R_factor_all           0.0676 
_refine_ls_R_factor_gt            0.0503 
_refine_ls_wR_factor_ref          0.1530 
_refine_ls_wR_factor_gt           0.1440 
_refine_ls_goodness_of_fit_ref    1.064 
_refine_ls_restrained_S_all       1.064 
_refine_ls_shift/su_max           0.000 
_refine_ls_shift/su_mean          0.000 
 
loop_ 
 _atom_site_label 
 _atom_site_type_symbol 
 _atom_site_fract_x 
 _atom_site_fract_y 
 _atom_site_fract_z 
 _atom_site_U_iso_or_equiv 
 _atom_site_adp_type 
 _atom_site_occupancy 
 _atom_site_symmetry_multiplicity 
 _atom_site_calc_flag 
 _atom_site_refinement_flags 
 _atom_site_disorder_assembly 
 _atom_site_disorder_group 
Fe1 Fe 0.72353(5) 0.35414(7) 0.41195(7) 0.0358(4) Uani 1 1 d . . . 
Cl1 Cl 0.81943(9) 0.31640(12) 0.60460(13) 0.0454(5) Uani 1 1 d . . . 
Cl2 Cl 0.65392(10) 0.43894(13) 0.43426(16) 0.0562(6) Uani 1 1 d . . . 
C7 C 0.6848(3) 0.3796(4) 0.1940(5) 0.0334(16) Uani 1 1 d . . . 
C5 C 0.7922(3) 0.4686(4) 0.3389(5) 0.0339(16) Uani 1 1 d . . . 
C11 C 0.5789(4) 0.3691(5) 0.1539(6) 0.0428(18) Uani 1 1 d . . . 
C6 C 0.7628(3) 0.3738(4) 0.2789(5) 0.0357(17) Uani 1 1 d . . . 
H6 H 0.7834 0.3579 0.2454 0.043 Uiso 1 1 calc R . . 
C8 C 0.6545(4) 0.4011(5) 0.0893(5) 0.0467(19) Uani 1 1 d . . . 
H8 H 0.6817 0.4113 0.0694 0.056 Uiso 1 1 calc R . . 
C4 C 0.8238(4) 0.5325(5) 0.3176(6) 0.053(2) Uani 1 1 d . . . 
H4 H 0.8277 0.5195 0.2652 0.063 Uiso 1 1 calc R . . 
C16 C 0.8573(4) 0.1553(5) 0.3154(6) 0.053(2) Uani 1 1 d . . . 
H16 H 0.8275 0.1157 0.3161 0.064 Uiso 1 1 calc R . . 
C10 C 0.5451(4) 0.3900(5) 0.0468(5) 0.0452(18) Uani 1 1 d . . . 
H10 H 0.4969 0.3924 -0.0025 0.054 Uiso 1 1 calc R . . 
C15 C 0.8799(3) 0.2413(5) 0.3727(5) 0.0409(17) Uani 1 1 d . . . 
C1 C 0.8089(4) 0.5662(5) 0.4684(6) 0.0495(19) Uani 1 1 d . . . 
C3 C 0.8495(4) 0.6166(6) 0.3759(8) 0.067(2) Uani 1 1 d . . . 
H3 H 0.8721 0.6610 0.3644 0.081 Uiso 1 1 calc R . . 
C14 C 0.8535(3) 0.2731(5) 0.4298(5) 0.0397(17) Uani 1 1 d . . . 
H14A H 0.8608 0.2218 0.4768 0.048 Uiso 1 1 calc R . . 
H14B H 0.8798 0.3288 0.4740 0.048 Uiso 1 1 calc R . . 
C9 C 0.5835(4) 0.4072(5) 0.0147(6) 0.053(2) Uani 1 1 d . . . 
H9 H 0.5618 0.4227 -0.0562 0.063 Uiso 1 1 calc R . . 
C19 C 0.9252(4) 0.2992(5) 0.3713(6) 0.0507(19) Uani 1 1 d . . . 
H19 H 0.9413 0.3572 0.4088 0.061 Uiso 1 1 calc R . . 
C17 C 0.9217(5) 0.1850(7) 0.2564(7) 0.070(2) Uani 1 1 d . . . 
H17 H 0.9352 0.1667 0.2167 0.084 Uiso 1 1 calc R . . 
C18 C 0.9458(4) 0.2696(7) 0.3134(7) 0.067(2) Uani 1 1 d . . . 
H18 H 0.9764 0.3077 0.3132 0.081 Uiso 1 1 calc R . . 
C2 C 0.8417(4) 0.6346(5) 0.4513(7) 0.066(2) Uani 1 1 d . . . 
H2 H 0.8581 0.6918 0.4904 0.079 Uiso 1 1 calc R . . 
C12 C 0.5368(4) 0.3453(7) 0.1859(6) 0.070(2) Uani 1 1 d . . . 
H12A H 0.5434 0.3939 0.2340 0.106 Uiso 1 1 calc R . . 
H12B H 0.5508 0.2838 0.2212 0.106 Uiso 1 1 calc R . . 
H12C H 0.4887 0.3428 0.1234 0.106 Uiso 1 1 calc R . . 
C13 C 0.8015(5) 0.5837(6) 0.5523(7) 0.075(3) Uani 1 1 d . . . 
H13A H 0.7533 0.5906 0.5185 0.112 Uiso 1 1 calc R . . 
H13B H 0.8259 0.6415 0.5911 0.112 Uiso 1 1 calc R . . 
H13C H 0.8206 0.5301 0.6010 0.112 Uiso 1 1 calc R . . 
N2 N 0.6483(3) 0.3646(4) 0.2265(4) 0.0374(14) Uani 1 1 d . . . 
N3 N 0.7792(2) 0.2981(4) 0.3548(4) 0.0344(13) Uani 1 1 d . . . 
H3A H 0.7486 0.2709 0.3555 0.041 Uiso 1 1 calc R . . 
N1 N 0.7832(3) 0.4848(4) 0.4104(4) 0.0403(14) Uani 1 1 d . . . 
C20 C 0.8779(4) 0.1275(6) 0.2581(6) 0.059(2) Uani 1 1 d . . . 
H20 H 0.8621 0.0696 0.2204 0.071 Uiso 1 1 calc R . . 
 
loop_ 
 _atom_site_aniso_label 
 _atom_site_aniso_U_11 
 _atom_site_aniso_U_22 
 _atom_site_aniso_U_33 
 _atom_site_aniso_U_23 
 _atom_site_aniso_U_13 
 _atom_site_aniso_U_12 
Fe1 0.0409(7) 0.0356(6) 0.0393(6) 0.0031(4) 0.0294(5) 0.0021(4) 
Cl1 0.0502(11) 0.0418(10) 0.0400(10) 0.0016(8) 0.0268(9) -0.0058(8) 
Cl2 0.0697(14) 0.0494(11) 0.0762(13) -0.0066(10) 0.0589(12) 0.0014(10) 
C7 0.044(4) 0.027(4) 0.032(4) 0.003(3) 0.025(4) 0.003(3) 
C5 0.032(4) 0.031(4) 0.035(4) 0.009(3) 0.020(4) 0.004(3) 
C11 0.043(5) 0.039(4) 0.052(5) 0.002(3) 0.033(4) 0.001(3) 
C6 0.038(4) 0.040(4) 0.041(4) 0.010(3) 0.030(4) 0.012(3) 
C8 0.047(5) 0.056(5) 0.050(5) 0.008(4) 0.036(5) 0.000(4) 
C4 0.055(5) 0.039(5) 0.065(5) 0.016(4) 0.039(5) 0.005(4) 
C16 0.038(4) 0.047(5) 0.064(5) 0.003(4) 0.027(4) 0.004(4) 
C10 0.035(4) 0.041(4) 0.045(5) 0.003(3) 0.018(4) -0.004(3) 
C15 0.034(4) 0.042(5) 0.039(4) 0.007(4) 0.020(4) 0.002(4) 
C1 0.049(5) 0.036(5) 0.055(5) 0.005(4) 0.029(4) -0.002(4) 
C3 0.065(6) 0.047(6) 0.103(7) 0.023(5) 0.060(6) -0.002(4) 
C14 0.036(4) 0.040(4) 0.043(4) 0.014(3) 0.025(4) 0.014(3) 
C9 0.050(5) 0.062(5) 0.036(4) 0.003(4) 0.023(5) -0.008(4) 
C19 0.051(5) 0.040(4) 0.064(5) -0.001(4) 0.038(4) 0.000(4) 
C17 0.071(6) 0.092(7) 0.060(6) 0.006(5) 0.048(5) 0.019(6) 
C18 0.063(6) 0.075(6) 0.082(6) 0.006(5) 0.054(5) 0.001(5) 
C2 0.059(5) 0.043(5) 0.089(6) -0.006(4) 0.043(5) -0.012(4) 
C12 0.051(5) 0.104(7) 0.068(6) 0.012(5) 0.043(5) -0.001(5) 
C13 0.099(7) 0.064(6) 0.076(6) -0.030(5) 0.062(6) -0.027(5) 
N2 0.037(4) 0.039(3) 0.045(3) 0.004(3) 0.030(3) 0.000(3) 
N3 0.031(3) 0.042(3) 0.040(3) 0.009(3) 0.027(3) 0.003(3) 
N1 0.041(4) 0.033(4) 0.046(3) 0.002(3) 0.028(3) -0.001(3) 
C20 0.045(5) 0.058(5) 0.058(5) -0.016(4) 0.026(4) 0.009(4) 
 
_geom_special_details 
; 
 All esds (except the esd in the dihedral angle between two l.s. planes) 
 are estimated using the full covariance matrix.  The cell esds are taken 
 into account individually in the estimation of esds in distances, angles 
 and torsion angles; correlations between esds in cell parameters are only 
 used when they are defined by crystal symmetry.  An approximate (isotropic) 
 treatment of cell esds is used for estimating esds involving l.s. planes. 
; 
 
loop_ 
 _geom_bond_atom_site_label_1 
 _geom_bond_atom_site_label_2 
 _geom_bond_distance 
 _geom_bond_site_symmetry_2 
 _geom_bond_publ_flag 
Fe1 N3 2.242(5) . ? 
Fe1 Cl2 2.3109(19) . ? 
Fe1 N2 2.317(5) . ? 
Fe1 N1 2.358(5) . ? 
Fe1 Cl1 2.4932(18) . ? 
Fe1 Cl1 2.5402(19) 7_656 ? 
Cl1 Fe1 2.5402(19) 7_656 ? 
C7 N2 1.327(8) . ? 
C7 C8 1.375(8) . ? 
C7 C6 1.512(9) . ? 
C5 N1 1.329(8) . ? 
C5 C4 1.369(9) . ? 
C5 C6 1.517(9) . ? 
C11 N2 1.342(8) . ? 
C11 C10 1.389(9) . ? 
C11 C12 1.478(9) . ? 
C6 N3 1.462(7) . ? 
C6 H6 0.9800 . ? 
C8 C9 1.374(9) . ? 
C8 H8 0.9300 . ? 
C4 C3 1.374(11) . ? 
C4 H4 0.9300 . ? 
C16 C20 1.371(10) . ? 
C16 C15 1.391(9) . ? 
C16 H16 0.9300 . ? 
C10 C9 1.371(9) . ? 
C10 H10 0.9300 . ? 
C15 C19 1.399(9) . ? 
C15 C14 1.504(9) . ? 
C1 N1 1.341(9) . ? 
C1 C2 1.392(10) . ? 
C1 C13 1.500(9) . ? 
C3 C2 1.375(11) . ? 
C3 H3 0.9300 . ? 
C14 N3 1.474(7) . ? 
C14 H14A 0.9700 . ? 
C14 H14B 0.9700 . ? 
C9 H9 0.9300 . ? 
C19 C18 1.387(10) . ? 
C19 H19 0.9300 . ? 
C17 C20 1.370(11) . ? 
C17 C18 1.372(12) . ? 
C17 H17 0.9300 . ? 
C18 H18 0.9300 . ? 
C2 H2 0.9300 . ? 
C12 H12A 0.9600 . ? 
C12 H12B 0.9600 . ? 
C12 H12C 0.9600 . ? 
C13 H13A 0.9600 . ? 
C13 H13B 0.9600 . ? 
C13 H13C 0.9600 . ? 
N3 H3A 0.8600 . ? 
C20 H20 0.9300 . ? 
 
loop_ 
 _geom_angle_atom_site_label_1 
 _geom_angle_atom_site_label_2 
 _geom_angle_atom_site_label_3 
 _geom_angle 
 _geom_angle_site_symmetry_1 
 _geom_angle_site_symmetry_3 
 _geom_angle_publ_flag 
N3 Fe1 Cl2 165.21(13) . . ? 
N3 Fe1 N2 72.16(18) . . ? 
Cl2 Fe1 N2 95.67(14) . . ? 
N3 Fe1 N1 72.51(19) . . ? 
Cl2 Fe1 N1 98.91(15) . . ? 
N2 Fe1 N1 86.32(18) . . ? 
N3 Fe1 Cl1 94.97(13) . . ? 
Cl2 Fe1 Cl1 97.63(7) . . ? 
N2 Fe1 Cl1 166.55(14) . . ? 
N1 Fe1 Cl1 93.60(14) . . ? 
N3 Fe1 Cl1 88.01(14) . 7_656 ? 
Cl2 Fe1 Cl1 100.40(7) . 7_656 ? 
N2 Fe1 Cl1 88.95(13) . 7_656 ? 
N1 Fe1 Cl1 160.48(15) . 7_656 ? 
Cl1 Fe1 Cl1 86.68(6) . 7_656 ? 
Fe1 Cl1 Fe1 93.32(6) . 7_656 ? 
N2 C7 C8 122.8(6) . . ? 
N2 C7 C6 116.5(5) . . ? 
C8 C7 C6 120.7(6) . . ? 
N1 C5 C4 123.5(6) . . ? 
N1 C5 C6 114.9(6) . . ? 
C4 C5 C6 121.5(6) . . ? 
N2 C11 C10 121.5(6) . . ? 
N2 C11 C12 119.8(6) . . ? 
C10 C11 C12 118.6(6) . . ? 
N3 C6 C7 108.0(5) . . ? 
N3 C6 C5 108.9(5) . . ? 
C7 C6 C5 110.8(5) . . ? 
N3 C6 H6 109.7 . . ? 
C7 C6 H6 109.7 . . ? 
C5 C6 H6 109.7 . . ? 
C9 C8 C7 119.1(6) . . ? 
C9 C8 H8 120.5 . . ? 
C7 C8 H8 120.5 . . ? 
C5 C4 C3 118.1(7) . . ? 
C5 C4 H4 121.0 . . ? 
C3 C4 H4 121.0 . . ? 
C20 C16 C15 121.5(7) . . ? 
C20 C16 H16 119.2 . . ? 
C15 C16 H16 119.2 . . ? 
C9 C10 C11 119.3(6) . . ? 
C9 C10 H10 120.4 . . ? 
C11 C10 H10 120.4 . . ? 
C16 C15 C19 118.1(7) . . ? 
C16 C15 C14 120.6(6) . . ? 
C19 C15 C14 121.2(6) . . ? 
N1 C1 C2 121.0(7) . . ? 
N1 C1 C13 119.3(6) . . ? 
C2 C1 C13 119.7(7) . . ? 
C4 C3 C2 119.6(7) . . ? 
C4 C3 H3 120.2 . . ? 
C2 C3 H3 120.2 . . ? 
N3 C14 C15 112.3(5) . . ? 
N3 C14 H14A 109.1 . . ? 
C15 C14 H14A 109.1 . . ? 
N3 C14 H14B 109.1 . . ? 
C15 C14 H14B 109.1 . . ? 
H14A C14 H14B 107.9 . . ? 
C10 C9 C8 118.8(6) . . ? 
C10 C9 H9 120.6 . . ? 
C8 C9 H9 120.6 . . ? 
C18 C19 C15 119.5(7) . . ? 
C18 C19 H19 120.2 . . ? 
C15 C19 H19 120.2 . . ? 
C20 C17 C18 120.0(8) . . ? 
C20 C17 H17 120.0 . . ? 
C18 C17 H17 120.0 . . ? 
C17 C18 C19 120.9(8) . . ? 
C17 C18 H18 119.6 . . ? 
C19 C18 H18 119.6 . . ? 
C3 C2 C1 119.1(7) . . ? 
C3 C2 H2 120.5 . . ? 
C1 C2 H2 120.5 . . ? 
C11 C12 H12A 109.5 . . ? 
C11 C12 H12B 109.5 . . ? 
H12A C12 H12B 109.5 . . ? 
C11 C12 H12C 109.5 . . ? 
H12A C12 H12C 109.5 . . ? 
H12B C12 H12C 109.5 . . ? 
C1 C13 H13A 109.5 . . ? 
C1 C13 H13B 109.5 . . ? 
H13A C13 H13B 109.5 . . ? 
C1 C13 H13C 109.5 . . ? 
H13A C13 H13C 109.5 . . ? 
H13B C13 H13C 109.5 . . ? 
C7 N2 C11 118.6(5) . . ? 
C7 N2 Fe1 109.0(4) . . ? 
C11 N2 Fe1 131.9(4) . . ? 
C6 N3 C14 113.1(5) . . ? 
C6 N3 Fe1 100.5(3) . . ? 
C14 N3 Fe1 121.9(4) . . ? 
C6 N3 H3A 123.5 . . ? 
C14 N3 H3A 123.5 . . ? 
Fe1 N3 H3A 49.9 . . ? 
C5 N1 C1 118.7(6) . . ? 
C5 N1 Fe1 109.7(4) . . ? 
C1 N1 Fe1 131.6(5) . . ? 
C17 C20 C16 119.9(7) . . ? 
C17 C20 H20 120.1 . . ? 
C16 C20 H20 120.1 . . ? 
 
_diffrn_measured_fraction_theta_max    1.000 
_diffrn_reflns_theta_full              25.10
_diffrn_measured_fraction_theta_full   1.000 
_refine_diff_density_max    0.575 
_refine_diff_density_min   -0.872 
_refine_diff_density_rms    0.229 
